# Supplementary material
Source: publisher site journal article supplement (https://www.spandidos-publications.com/1799/downloadSupplementary)

Figure S1. Expression of Cl-1 in the cervix of 2-, 4- and 7-month-old FvB mice. The dashed white line represents the border between the epithelial basal cell layer and the stroma. S, stroma; \*Cervical lumen; Cl, claudin.

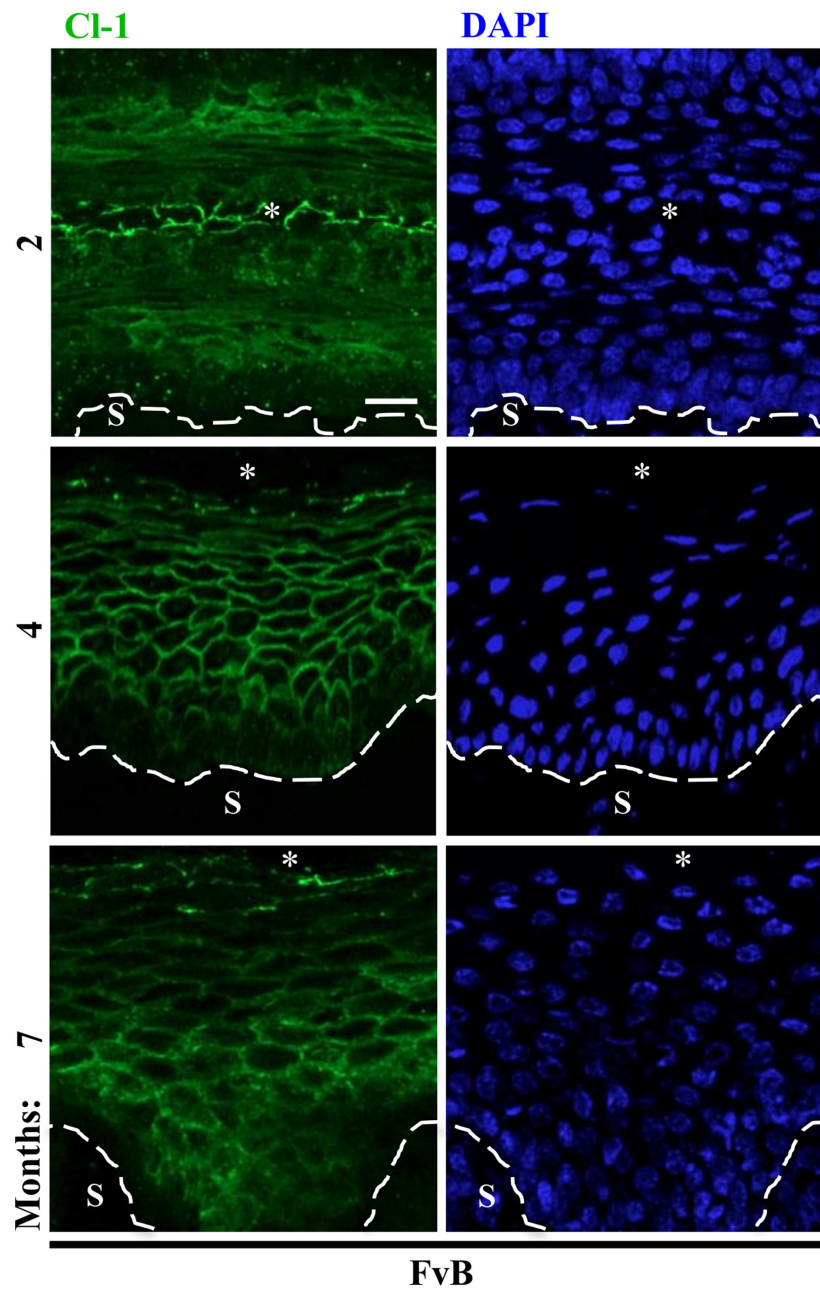

Figure S2. Expression of Cl-1 in the cervix of 2-, 4- and 7-month-old FvB mice treated with +E2. The dashed white line represents the border between the epithelial basal cell layer and the stroma. S, stroma; \*Cervical lumen; Cl, claudin; E2, 17 $\beta$ -estradiol.

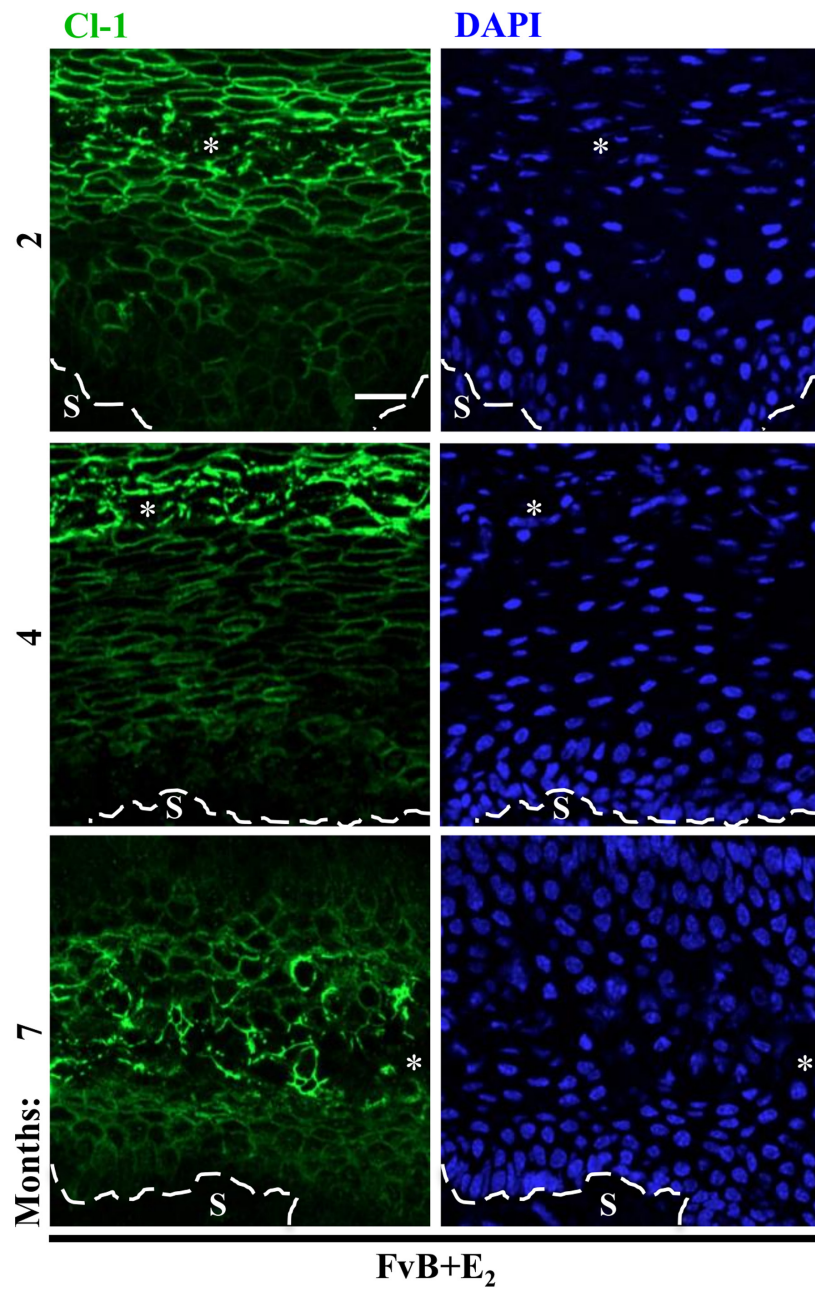

Figure S3. Expression of Cl-1 in the cervix of 2-, 4- and 7-month-old K14E7 mice. The dashed white line represents the border between the epithelial basal cell layer and the stroma. S, stroma; \*Cervical lumen; Cl, claudin.

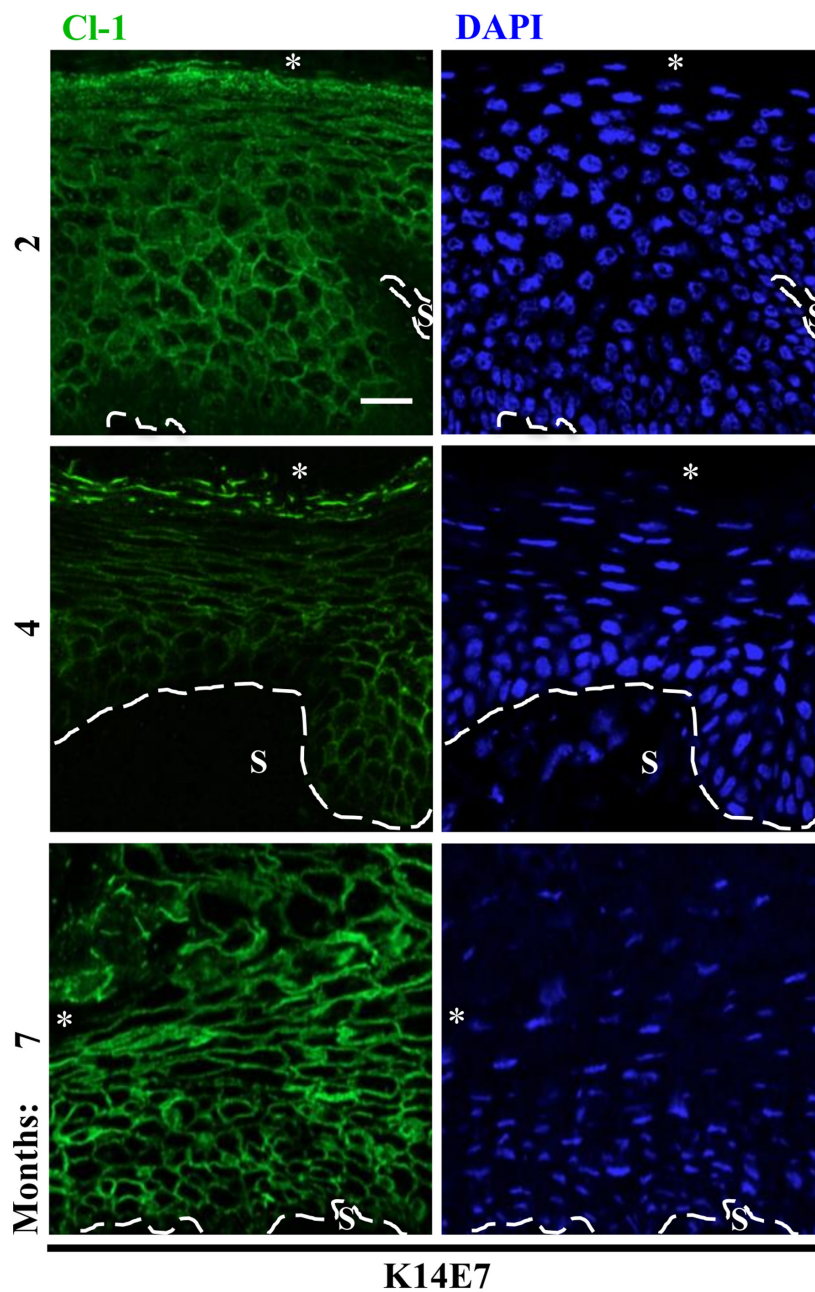



Figure S5. Expression of Cl-10 in the cervix of 2-, 4- and 7-month-old FvB mice. The dashed white line represents the border between the epithelial basal cell layer and the stroma. S, stroma; \*Cervical lumen; Cl, claudin.

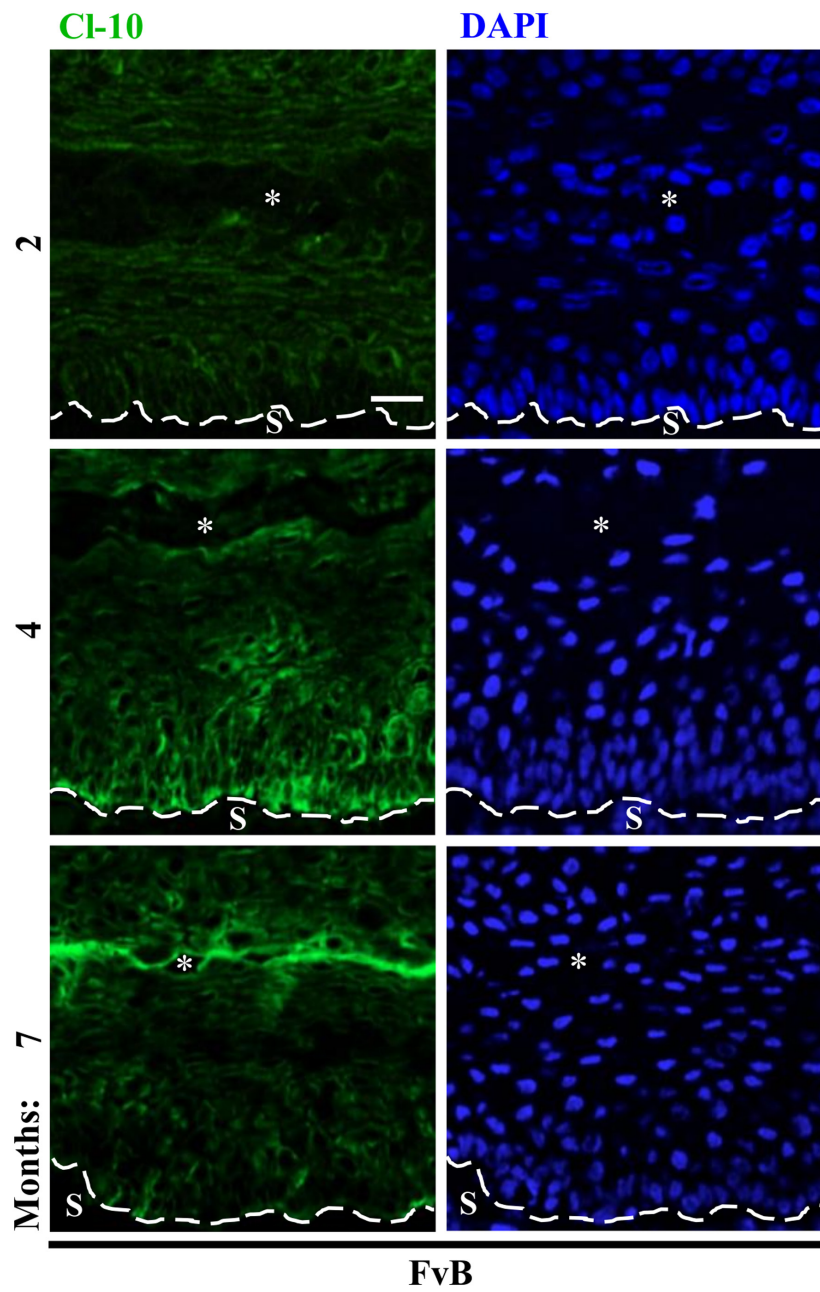

Figure S6. Expression of Cl-10 in the cervix of 2-, 4- and 7-month-old FvB mice treated with E2. The dashed white line represents the border between the epithelial basal cell layer and the stroma. S, stroma; \*Cervical lumen; Cl, claudin; E2, 17 $\beta$ -estradiol.

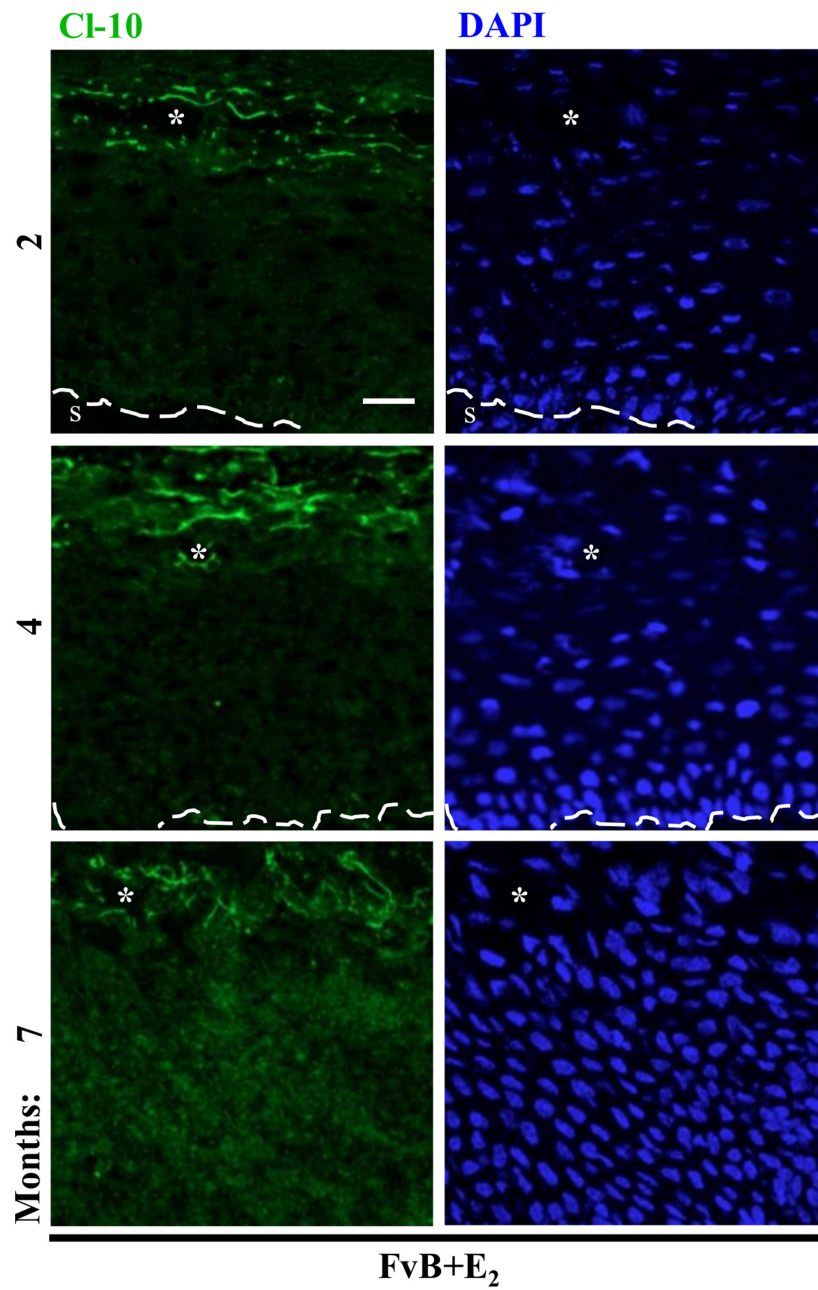

Figure S7. Expression of Cl-10 in the cervix of 2-, 4- and 7-month-old K14E7 mice. The dashed white line represents the border between the epithelial basal cell layer and the stroma. S, stroma; \*Cervical lumen; Cl, claudin.

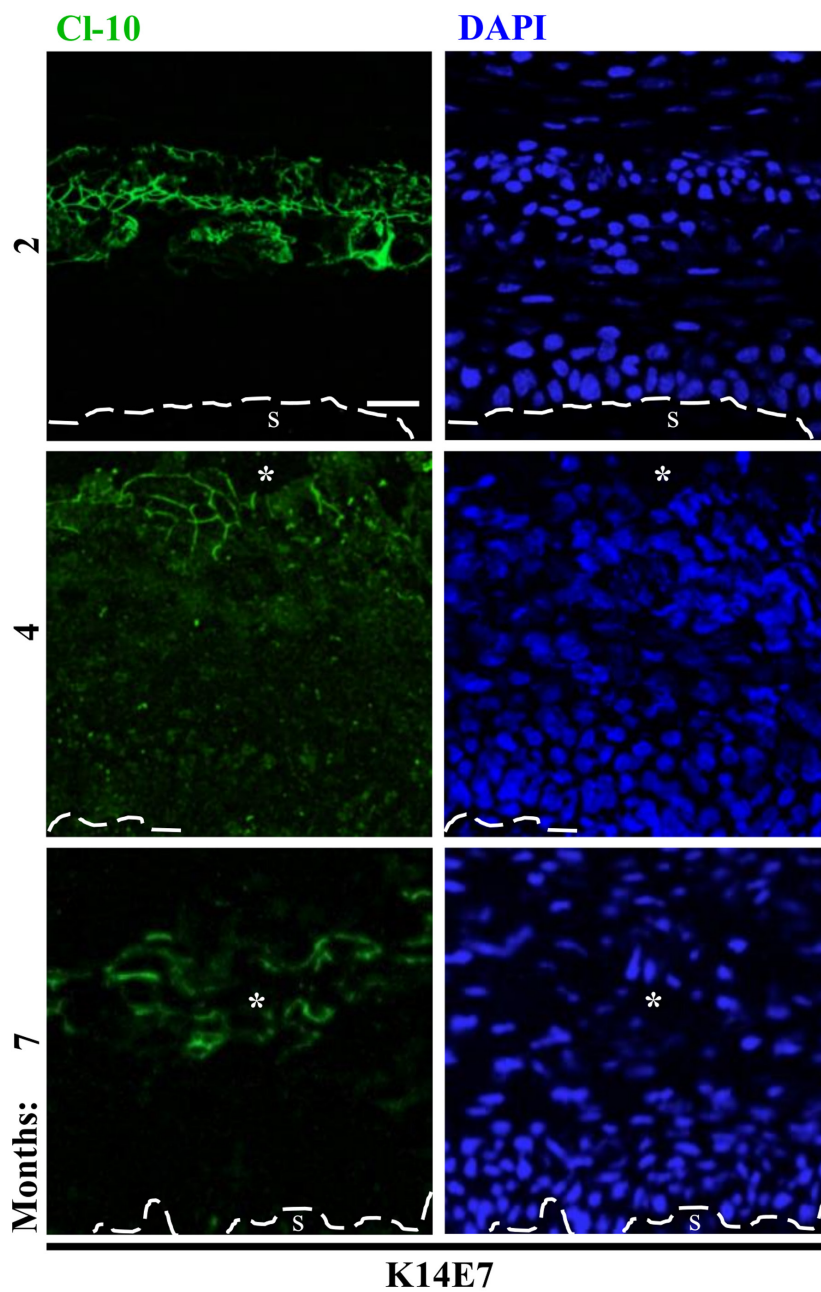

Figure S8. Expression of Cl-10 in the cervix of 2-, 4- and 7-month-old K14E7 mice treated with E<sub>2</sub>. The dashed white line represents the border between the epithelial basal cell layer and the stroma. S, stroma; \*Cervical lumen; Cl, claudin; E<sub>2</sub>, 17β-estradiol.

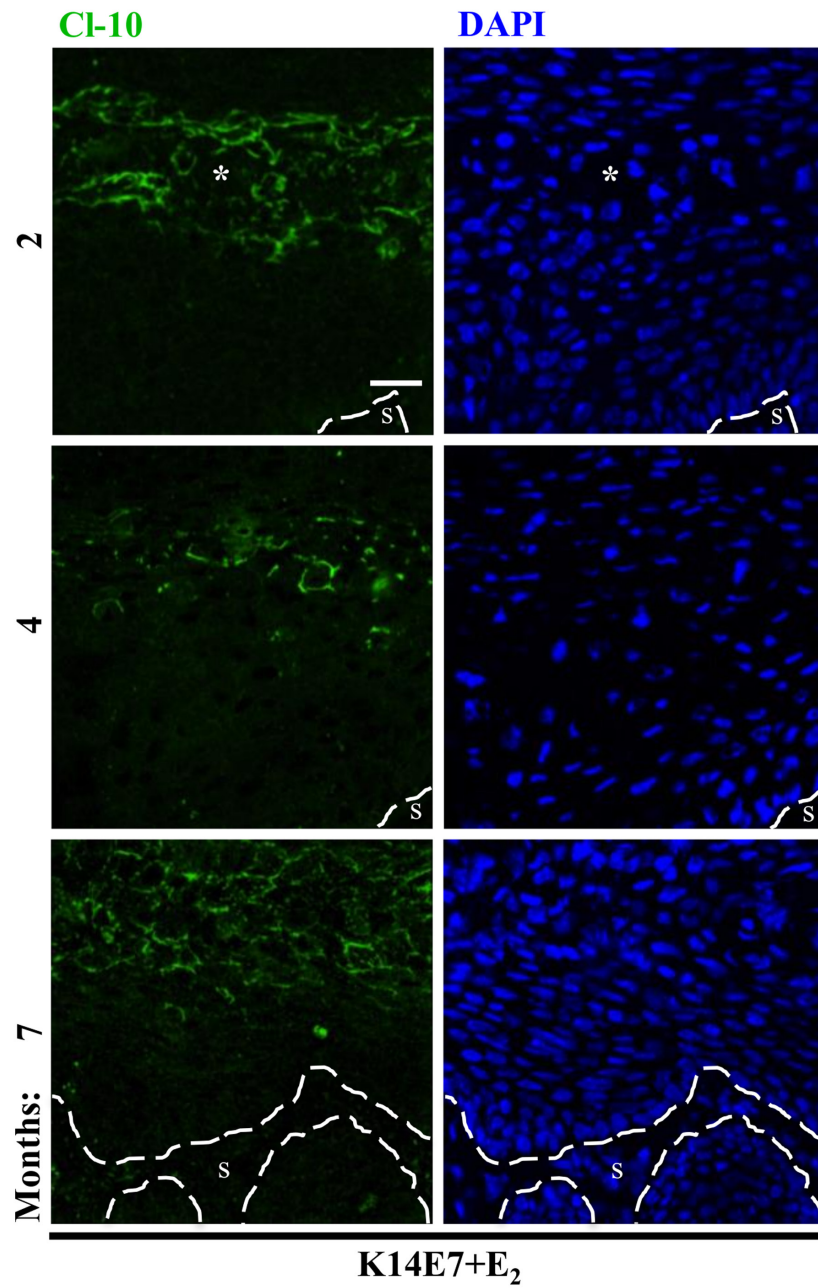

Supplement: Supplementary file 1 [file downloadSupplementary]
